# Supplementary material for: Risk and Resilience: How Is the Health of Older Adults and Immigrant People Living in Canada Impacted by Climate- and Air Pollution-Related Exposures?
Source: MDPI journal article supplement (doi:10.3390/ijerph182010575), 2021-10-09
Supplement: s1 [file s1]

## Supplementary Material

The following table is a more detailed summary of the articles included in this scoping review. Significant results pertaining to older adults and immigrants are reported. In some cases there were a large number of measures of association reported, so a written summary is given instead of the values.

**Table S2.** Climatic and air pollution variables and links to health in older adults and immigrant populations.

| Authors               | Location, setting, and period       | Population (n, sex, age)                                                                                                                                                       | Primary exposure variables                   | Health impact category | Study Design | Relevant contextual factors adjusted for in study | Main findings [95% CI]                                                                                                                   |
|-----------------------|-------------------------------------|--------------------------------------------------------------------------------------------------------------------------------------------------------------------------------|----------------------------------------------|------------------------|--------------|---------------------------------------------------|------------------------------------------------------------------------------------------------------------------------------------------|
| <b>Meteorological</b> |                                     |                                                                                                                                                                                |                                              |                        |              |                                                   |                                                                                                                                          |
| Vanasse 2017 [29]     | Quebec; urban; 2001 – 2011          | 112,793 participants; 48.5% male; Age: ≥65 years, mean age 79.8 years (7.9 SD)                                                                                                 | Mean temperature                             | Cardiovascular         | Cohort       | Sex, comorbidities, season, region                | Mean temperature (3 day lag) RR: 0.994 [0.992, 0.996]<br>Atmospheric pressure (7 day lag) RR: 1.045 [1.015, 1.077]                       |
| Bai 2018a [30]        | Ontario; province wide; 1996 – 2013 | <b>Coronary heart disease:</b> 1,389,057 cases; 65.9 % male; Age: mean age 66.5 (64-82 IQR)<br><b>Stroke:</b> 355,837 stroke cases; 50.8% male; Age: mean age 71.0 (64-82 IQR) | Mean, maximum, and extreme temperatures      | Cardiovascular         | Cohort       | Age, sex, comorbidities                           | Hot days<br>≥65 years taking oral anticoagulants RR: 1.48 [1.11, 1.97]<br>≥65 years not taking oral anticoagulants RR: 0.99 [0.89, 1.10] |
| Vida 2012 [31]        | Quebec; urban; 1995 – 2007          | 347,552 events; Age: <65 years, ≥65 years (distribution NR)                                                                                                                    | Mean temperature, diurnal temperature change | Mental health          | Ecological   | Age, region                                       | 20°C IRR: 1.00 [0.98, 1.02]<br>22.5°C IRR: 1.03 [1.01, 1.06]<br>25°C IRR: 1.09 [1.03, 1.15]                                              |

|                             |                                                     |                                                                                                                                                               |                                                     |                                        |            |                                                                                                                                   |                                                                                                                                                                         |
|-----------------------------|-----------------------------------------------------|---------------------------------------------------------------------------------------------------------------------------------------------------------------|-----------------------------------------------------|----------------------------------------|------------|-----------------------------------------------------------------------------------------------------------------------------------|-------------------------------------------------------------------------------------------------------------------------------------------------------------------------|
| <b>Wang 2014 [32]</b>       | Ontario; urban; April 2002 – March 2010             | 271,746 events; Age: 0-14 years, 15-39 years, 50-59 years, ≥60 years (distribution NR)                                                                        | Minimum, maximum, mean temperature                  | Mental health                          | Ecological | Age, sex                                                                                                                          | High temperature associated with increased risk in ≥60 years.                                                                                                           |
| <b>Benmarhnia 2017 [33]</b> | Quebec; urban; 1990 – 2010 (June – August, summers) | Age: <65 years vs. ≥65 years (distribution NR)                                                                                                                | Mean temperature (threshold and percentile methods) | Mortality                              | Ecological | Age                                                                                                                               | ≥65 years RR: 1.16 [1.12, 1.19]                                                                                                                                         |
| <b>Henderson 2013 [34]</b>  | British Columbia; province-wide; 1986 – 2010        | ~4.6 million people; Age: <75 years vs. ≥75 years<br>% ≥75 years<br>1986/2010:<br>Coast: 4.5/6.6<br>Dry Plateau: 4.7/8.5<br>Mountain 3.0/6.8<br>North 1.3/4.3 | Apparent maximum temperature (°C)                   | Mortality                              | Ecological | Age, periods                                                                                                                      | Coast, ≥75 yrs: 18% [14, 22%] increase                                                                                                                                  |
| <b>Vutcovici 2014 [35]</b>  | Quebec; urban; 1984 – 2007                          | Mean 30.1 (6.9 SD) deaths per day for 8,766 days; Age: ≥65 years                                                                                              | Diurnal temperature change                          | Mortality                              | Ecological | None                                                                                                                              | 25 <sup>th</sup> %ile to 75 <sup>th</sup> %ile change: 5.12% [0.02, 10.49%] increase<br>75 <sup>th</sup> to 99 <sup>th</sup> %ile change: 11.27% [2.08, 1.29%] increase |
| <b>Kosatsky 2012 [36]</b>   | British Columbia; urban; 2001 – 2009                | 398 participants; Age: <65 years, 65-75 years, 75-85 years, ≥85 (distribution NR)                                                                             | Heatwave                                            | Mortality; cardiovascular; respiratory | Case-only  | % below low-income cut-off, population density, age, place of death (home, hospital, residential institution, other), % ≥65 years | 65-74 yrs: 1.47 [1.06, 2.03] ( <i>ref.</i> ≥85)                                                                                                                         |

|                           |                                           |                                                                                                                          |                                                                                                                  |                                                           |                    |                                                                                                   |                                                                                                                                                                               |
|---------------------------|-------------------------------------------|--------------------------------------------------------------------------------------------------------------------------|------------------------------------------------------------------------------------------------------------------|-----------------------------------------------------------|--------------------|---------------------------------------------------------------------------------------------------|-------------------------------------------------------------------------------------------------------------------------------------------------------------------------------|
| <b>Chen 2016 [37]</b>     | Ontario;<br>province-wide;<br>1996 – 2010 | 352,818 cases;<br>49% male;<br>Age: mean age 76 (68-86 IQR)                                                              | Mean<br>temperature                                                                                              | Mortality;<br>cardiovascular;<br>respiratory;<br>diabetes | Case-<br>crossover | Time, age, sex, place<br>of death (long-term<br>care facility, hospital,<br>other), comorbidities | Cold and<br>cardiovascular<br>mortality:<br>≥65 years: 3.0% [2.0,<br>5.0%] increase                                                                                           |
| <b>Bustinza 2013 [38]</b> | Quebec;<br>province-wide;<br>2005 – 2010  | ~6 million people;<br>Age (2005-2009, 2010):<br><65 years (178, 240),<br>65-74 years (132, 160),<br>≥75 years (450, 639) | Heatwave                                                                                                         | Mortality;<br>overall<br>morbidity                        | Ecological         | Age                                                                                               | Crude rates per<br>100,000 person days<br>≥75 years<br>Ref: 15.99 (15.34,<br>16.66)<br>Heatwave: 21.22<br>(19.64, 22.93)                                                      |
| <b>Burton 2015 [39]</b>   | Canada wide;<br>2015 – 2015               | NR                                                                                                                       | Flooding                                                                                                         | Mortality;<br>respiratory;<br>mental health               | Review             | Various                                                                                           | Older adults at risk of<br>adverse health events<br>due to flooding                                                                                                           |
| <b>Mondor 2015 [40]</b>   | Quebec; urban;<br>1998 – 2006             | 136, 323 participants;<br>Age: ≥65 years                                                                                 | Freezing rain,<br>snowstorms                                                                                     | Fall-related<br>injuries                                  | Ecological         | Age, sex                                                                                          | Freezing rain<br>All injuries<br>65-74 IRR: 1.24 [1.06,<br>1.46]<br>≥75 IRR: 1.17 [1.02,<br>1.34]<br>All injuries except hip<br>fractures:<br>65-74 IRR: 1.28 [1.08,<br>1.50] |
| <b>Modarres 2012 [41]</b> | Quebec; urban;<br>1993 – 2004             | 22,855 events out of<br>1,077,813 at risk;<br>24.2% male;<br>Age: 40-74 years, ≥75<br>years                              | Minimum,<br>maximum,<br>mean<br>temperature,<br>precipitation,<br>snow depth,<br>daylight hours,<br>air pressure | Fall-related<br>injuries                                  | Ecological         | Age, sex, seasonality,<br>factors                                                                 | Decreasing<br>temperature, rainfall,<br>and hours of sunshine<br>and increased snow,<br>was associated with<br>hip fracture in older<br>adults.                               |

|                             |                                                    |                                                                                                                                           |                                                                                             |                       |                 |                                                                                                                                                                                                      |                                                                                                                                            |
|-----------------------------|----------------------------------------------------|-------------------------------------------------------------------------------------------------------------------------------------------|---------------------------------------------------------------------------------------------|-----------------------|-----------------|------------------------------------------------------------------------------------------------------------------------------------------------------------------------------------------------------|--------------------------------------------------------------------------------------------------------------------------------------------|
| <b>Modarres 2014 [42]</b>   | Quebec; urban; 1993 – 2004                         | 22,850 hip fractures; 24.2% male; Age: 40-74 years, ≥75 years                                                                             | Minimum, maximum, mean temperature, precipitation, snow depth, daylight hours, air pressure | Fall-related injuries | Ecological      | Sex, age, number of days                                                                                                                                                                             | Maximum pressure and daylight hours were important predictors for older adults. Rainfall depth was an important predictor for older males. |
| <b>Auger 2017 [43]</b>      | Quebec; province-wide; April 2006 – September 2013 | 14,302 participants; 58.8% male; Age: <55 years (28%), 55-64 years (27%), 65-74 years (26%), ≥75 years (19%)                              | Mean temperature                                                                            | Ocular                | Case-crossover  | Age, sex                                                                                                                                                                                             | 65-74 years: OR 1.98 [1.30, 3.02]                                                                                                          |
| <b>Laverdière 2016 [44]</b> | Quebec; urban; 2006 – 2010                         | 1,233 participants; 48% males; Age: 68-72 years, 73-77 years, 78-82 years (distribution NR)                                               | Daily maximum temperature ≥30°C                                                             | Overall morbidity     | Cohort          | Household income < \$20,000, Material and Social Deprivation Index, social isolation, social participation, air conditioning, autonomy, mental and physical disorders, medication, urban heat island | Emergency department presentations AOR: 2.6 [2.0, 3.5]<br>Hospitalizations AOR: 1.7 [1.1, 2.6]                                             |
| <b>Bélanger 2014* [45]</b>  | Quebec; urban; 2010 – 2011                         | 3485 participants; 54.2% male; Age: 18-35 years (17.6%), 35-44 years (13.4%), 45-54 years (18.5%), 55-64 years (21.3%), ≥65 years (29.3%) | Hot and humid days                                                                          | Overall morbidity     | Cross-sectional | Household type, length of residence in Canada, language, education, household income, employment, relative economic status, air conditioning, age, sex, SES factors, comorbidities                   | Low income ≥65 years (multivariate) OR: 1.5 [1.1–2.1]<br>Foreign born (bivariate) OR: 0.8 [0.6, 0.9]                                       |

|                                         |                                      |                                                                                                                            |                                                          |                             |                                   |                                                                        |                                                                                                                                                                              |
|-----------------------------------------|--------------------------------------|----------------------------------------------------------------------------------------------------------------------------|----------------------------------------------------------|-----------------------------|-----------------------------------|------------------------------------------------------------------------|------------------------------------------------------------------------------------------------------------------------------------------------------------------------------|
| <b>Stapleton 2014 [46]</b>              | Ontario; not stated; published 2014  | 24 participants<br>Age: 12 younger participants, mean age 21 years (3 SD); 12 older participants, mean age 65 years (5 SD) | Hot-dry and hot-humid conditions                         | Overall morbidity           | Non-randomized experimental study | None                                                                   | In both hot-dry and hot-humid conditions, older adults showed a significant increase in body heat content compared to younger adults.                                        |
| <b>Tajmir 2013 [47]</b>                 | Ontario; not-stated; published 2013  | 18 participants (10 younger; 20% male; mean age 26 (2.4 SD); 8 older; 62.5% male; mean age 68 (4.4 SD)                     | Temperature categories; 23°C vs. 1°C                     | Overall morbidity           | Non-randomized experimental study | NA                                                                     | Older adults had greater impairment of manual movements in cold conditions and reduced sensitivity to decreasing temperatures.                                               |
| <b>McTavish 2018 [48]</b>               | Ontario; province-wide; 2005 – 2012  | 52,913 cases and 174,222 controls; 51.5% male; median age 80 (74-85 IQR), >79 years (51.3%)                                | Maximum temperature                                      | Renal                       | Case-control                      | Neighborhood level income, older age subsets, heat and humidex periods | OR: 1.11 [1.00-1.23]                                                                                                                                                         |
| <b>Ordon 2015 [49]</b>                  | Ontario; province-wide; 2002 – 2013  | 423,396 participants; 73% male; 18-39 years (31%), 40-49 years (25%), 50-59 years (22%), 60-69 years (13%), >70 years (8%) | Minimum, maximum, mean temperature, extreme temperatures | Renal                       | Ecological                        | Income, region of residence, age, sex, comorbid conditions             | Heat (90 <sup>th</sup> vs 10 <sup>th</sup> %ile) 60-69 yrs RR: 1.31 [1.02, 1.68]<br>Extreme heat (99 <sup>th</sup> vs 10 <sup>th</sup> %ile) 60-69 yrs RR: 1.44 [1.06, 1.96] |
| <b>Meteorological and Air pollution</b> |                                      |                                                                                                                            |                                                          |                             |                                   |                                                                        |                                                                                                                                                                              |
| <b>Krstic 2011 [50]</b>                 | British Columbia; urban; 2004 – 2006 | ≥65 years                                                                                                                  | Steadman's apparent temperature, PM <sub>2.5</sub>       | Cardiovascular; respiratory | Cross-sectional                   | Number of days                                                         | High and low temperatures associated with increased mortality.                                                                                                               |
| <b>Air pollution</b>                    |                                      |                                                                                                                            |                                                          |                             |                                   |                                                                        |                                                                                                                                                                              |

|                                     |                                               |                                                                                                                                                             |                                                               |                |                    |                                                                                                                                                                                                                      |                                                                                                                           |
|-------------------------------------|-----------------------------------------------|-------------------------------------------------------------------------------------------------------------------------------------------------------------|---------------------------------------------------------------|----------------|--------------------|----------------------------------------------------------------------------------------------------------------------------------------------------------------------------------------------------------------------|---------------------------------------------------------------------------------------------------------------------------|
| <b>Parent 2013*</b><br><b>[51]</b>  | Quebec; urban;<br>2005 – 2008                 | 803 cases and 969<br>controls;<br>male only;<br>Age: <60 years<br>(21.3%), 60<66 years<br>(28.1%), 66<71 years<br>(24.5%), >71 years<br>(26%)               | NO <sub>2</sub>                                               | Cancer         | Case-control       | Annual household<br>income, education,<br>% recent immigrants,<br>smoking and<br>lifestyle habits,<br>severity and<br>screening of cancer,<br>residence                                                              | 3 <sup>rd</sup> quartile recent<br>immigrants OR: 1.42<br>[1.09, 1.86]                                                    |
| <b>Goldberg 2018</b><br><b>[52]</b> | Quebec; urban;<br>1996 – 1997                 | 375 cases and 413<br>controls;<br>female only;<br>Age range: 50-70<br>years                                                                                 | UFP                                                           | Cancer         | Case-control       | Education, ethnicity,<br>official language,<br>neighborhood<br>income,<br>unemployment rate,<br>education, length of<br>residence <10 years<br>vs. ≥10 years,<br>hormonal receptor<br>status                         | Positive but<br>insignificant<br>associations                                                                             |
| <b>Goldberg 2017</b><br><b>[53]</b> | Quebec; urban;<br>2008 - 2011                 | 681 cases and 596<br>controls;<br>female only;<br>Age: mean age cases<br>62.23 years (SD NR),<br>controls 61.03 years<br>(SD NR)                            | NO <sub>2</sub> , UFP                                         | Cancer         | Case-<br>Control   | Education, ethnicity,<br>official language,<br>neighborhood<br>income,<br>unemployment rate,<br>education, % recent<br>immigrants, length<br>of residence <10<br>years vs. ≥10 years,<br>hormonal receptor<br>status | Positive but<br>insignificant<br>associations                                                                             |
| <b>Chen 2014 [54]</b>               | Alberta; urban;<br>April 1998 –<br>March 2002 | 5229 participants;<br>51% male;<br>Age: 25-44 years<br>(4.1%), 45-64 years<br>(23.7%), 65-74 years<br>(27.1%), 75-84 years<br>(31.1%), ≥85 years<br>(13.5%) | AQHI, NO <sub>2</sub> ,<br>O <sub>3</sub> , PM <sub>2.5</sub> | Cardiovascular | Case-<br>crossover | Age, sex                                                                                                                                                                                                             | ≥75 years (1-72 hour<br>lag)<br>AQHI OR: 1.30 [1.10,<br>1.54]<br>Single pollutant<br>model<br>CO OR: 1.50 [1.19,<br>1.90] |

|                                  |                                               |                                                                                                                                             |                                                                          |                |                    |                                                                 |                                                                                                                        |
|----------------------------------|-----------------------------------------------|---------------------------------------------------------------------------------------------------------------------------------------------|--------------------------------------------------------------------------|----------------|--------------------|-----------------------------------------------------------------|------------------------------------------------------------------------------------------------------------------------|
|                                  |                                               |                                                                                                                                             |                                                                          |                |                    |                                                                 | Multi pollutant model<br>NO <sub>2</sub> OR: 1.70 [1.24,<br>2.34]                                                      |
| <b>Wang 2015 [55]</b>            | Alberta;<br>province-wide;<br>1999 – 2009     | 25,894 events;<br>67% male;<br>Age: <65 years, ≥65<br>years                                                                                 | CO, NO <sub>2</sub> , NO,<br>O <sub>3</sub> , PM <sub>2.5</sub>          | Cardiovascular | Case-<br>crossover | Age, sex,<br>comorbidities                                      | Observed positive<br>associations with NO <sub>2</sub><br>and NO and negative<br>associations with CO<br>in ≥65 years. |
| <b>Weichenthal<br/>2017 [56]</b> | British<br>Columbia;<br>urban; 2008 –<br>2015 | 2,881 events;<br>68% male;<br><65 years (45.9%), ≥65<br>years (54.1%)                                                                       | PM <sub>2.5</sub> , NO <sub>2</sub> , O <sub>3</sub>                     | Cardiovascular | Case-<br>crossover | Age, sex, city                                                  | ≥65 years<br>PM <sub>2.5</sub> (3-day mean)<br>OR: 1.06 [1.03, 1.08]                                                   |
| <b>Gan 2011 [57]</b>             | British<br>Columbia;<br>urban; 1994 –<br>2002 | 452,735 participants;<br>45.9% male;<br>Age: mean age 58.9<br>(10.5 SD), <60 years,<br>60-69 years, ≥70 years                               | BC, NO, NO <sub>2</sub> ,<br>PM <sub>2.5</sub>                           | Cardiovascular | Cohort             | Neighborhood<br>income, age, sex,<br>comorbidity                | BC associated with<br>increased risk of<br>mortality in ≥60 years<br>and hospitalizations<br>in 60-69 years.           |
| <b>Shin 2019 [58]</b>            | Ontario;<br>province wide;<br>2001 – 2015     | 5,071,956 participants;<br>Age: 35-44 years<br>(32%), 45-54 years<br>(28%), 55-64 years<br>(18%), 65-74 years<br>(14%), 75-85 years<br>(8%) | NO <sub>2</sub> , O <sub>3</sub> , O <sub>x</sub> ,<br>PM <sub>2.5</sub> | Cardiovascular | Cohort             | Household income,<br>age, sex,<br>comorbidities, stroke<br>type | All pollutants were<br>associated with<br>increased risk of<br>cardiovascular<br>outcomes.                             |

|                        |                                                                                                                                                           |                                                                                                                                                                                                                                                                                                                                                                                                                                                      |                                                                          |                |            |                                                                                                                                                                                                                                                           |                                                                      |
|------------------------|-----------------------------------------------------------------------------------------------------------------------------------------------------------|------------------------------------------------------------------------------------------------------------------------------------------------------------------------------------------------------------------------------------------------------------------------------------------------------------------------------------------------------------------------------------------------------------------------------------------------------|--------------------------------------------------------------------------|----------------|------------|-----------------------------------------------------------------------------------------------------------------------------------------------------------------------------------------------------------------------------------------------------------|----------------------------------------------------------------------|
| <b>Bai 2019 [59]</b>   | Ontario;<br>province-wide;<br>April 2001 –<br>December 2015                                                                                               | Congestive heart<br>failure: 50,062,146<br>participants;<br>48% male;<br>Age: mean age 53.3<br>(13.0 SD); 35-44 years<br>(5%), 45-54 years<br>(12%), 55-64 years<br>(20%), 65-74 years<br>(33%), 75-85 years<br>(30%);<br>Acute myocardial<br>infarction:<br>5,141,172 participants;<br>47.7% male;<br>Age: mean age 53.6<br>(13.2 SD); 35-44 years<br>(12%), 45-54 years<br>(21%), 55-64 years<br>(21%), 65-74 years<br>(25%), 75-85 years<br>(21%) | PM <sub>2.5</sub> , NO <sub>2</sub> ,<br>O <sub>3</sub> , O <sub>x</sub> | Cardiovascular | Cohort     | Neighborhood level<br>education,<br>unemployment, %<br>recent immigrants,<br>regional differences,<br>Ontario<br>Marginalization<br>Index, access to<br>health care, % visible<br>minorities, age, sex,<br>comorbidities,<br>income level, O <sub>x</sub> | All pollutants<br>associated with<br>increased risk in ≥65<br>years. |
| <b>Shin 2018a [60]</b> | Alberta, British<br>Columbia,<br>Manitoba,<br>Newfoundland<br>and Labrador,<br>Nova Scotia,<br>Ontario, Quebec,<br>Saskatchewan;<br>urban; 1996 –<br>2012 | 52-54% of Canadian<br>population during the<br>study period;<br>Age: <50 years, ≥50<br>years, ≥65 years                                                                                                                                                                                                                                                                                                                                              | O <sub>3</sub>                                                           | Cardiovascular | Ecological | Age, sex, calendar<br>time                                                                                                                                                                                                                                | No significant<br>associations ≥50 years.                            |

|                        |                                                                                                                                |                                                                                                                                                                                                                                                    |                                                                                  |                |             |                  |                                                                                                                     |
|------------------------|--------------------------------------------------------------------------------------------------------------------------------|----------------------------------------------------------------------------------------------------------------------------------------------------------------------------------------------------------------------------------------------------|----------------------------------------------------------------------------------|----------------|-------------|------------------|---------------------------------------------------------------------------------------------------------------------|
| <b>Shin 2020 [61]</b>  | Alberta, British Columbia, Manitoba, Newfoundland and Labrador, Nova Scotia, Ontario, Quebec, Saskatchewan; urban; 1984 – 2012 | ~53% of the Canadian population during the study period; 51% male; Age: 1-65 years (91-86%), >65 years (9-14%)                                                                                                                                     | O <sub>3</sub>                                                                   | Cardiovascular | Ecological  | Age, sex, season | ≥65 years: 0.8% [0.2, 1.3%] increase                                                                                |
| <b>Stieb 2017 [62]</b> | Ontario; rural; 2013 – 2014                                                                                                    | 2013: 36 participants; 44.4% male; Age: 55-59 years (30.6%), 60-64 years (44.4%), 65-69 years (16.7%), ≥70 (8.3%); 2014: 41 participants; 34.1% male; 55-59 years (19.5%), 60-64 years (29.3%), 65-69 years (31.7%), ≥70 years (22%)               | AQHI, CO, NO <sub>2</sub> , O <sub>3</sub> , PM <sub>2.5</sub> , SO <sub>2</sub> | Cardiovascular | Panel study | Sex, statin use  | AQHI, PM <sub>2.5</sub> , and O <sub>3</sub> associated with subclinical adverse cardio-respiratory effects.        |
| <b>Stieb 2018 [63]</b> | British Columbia; urban; 2014 – 2015                                                                                           | 2014: 36 participants; 44.4% male; Age: 55-59 years (16.7%), 60-64 years (41.7%), 65-69 years (25.0%), ≥70 years (16.7%); 2015: 34 participants; 32.7% male; Age: 55-59 years (23.5%), 60-64 years (44.1%), 65-69 years (17.6%), ≥70 years (14.6%) | AQHI, CO, NO <sub>2</sub> , O <sub>3</sub> , PM <sub>2.5</sub> , SO <sub>2</sub> | Cardiovascular | Panel study | Sex, statin use  | AQHI, PM <sub>2.5</sub> , O <sub>3</sub> and O <sub>x</sub> associated with subclinical cardio-respiratory effects. |

|                            |                                                              |                                                                                                                                                                                                                                                                         |                                                                |                             |                          |                                                                                                                         |                                                                                                                                            |
|----------------------------|--------------------------------------------------------------|-------------------------------------------------------------------------------------------------------------------------------------------------------------------------------------------------------------------------------------------------------------------------|----------------------------------------------------------------|-----------------------------|--------------------------|-------------------------------------------------------------------------------------------------------------------------|--------------------------------------------------------------------------------------------------------------------------------------------|
| <b>Stieb 2019 [64]</b>     | Ontario; urban; 2015                                         | Exercise indoors during poor air quality group: 37 participants; 45.9% male; Age: mean age 66 years (55-81 range); Control group: 35 participants; 42.9% male; Age: mean age 65 years (55-79 range)                                                                     | AQHI, CO, NO <sub>2</sub> , O <sub>3</sub> , PM <sub>2.5</sub> | Cardiovascular              | Randomized control trial | None                                                                                                                    | AQHI and PM <sub>2.5</sub> associated with subclinical cardio-respiratory effects and markers of oxidative stress.                         |
| <b>Bai 2018b [65]</b>      | Ontario; urban; 1996 – 2012                                  | Hypertension: 893,499 participants; 48% male; Age: mean age 48.6 (SD 14.3); Diabetes: 1,056,012 participants; 47% male; Age: mean age 51.1 (15.3 SD)                                                                                                                    | UFP, NO <sub>2</sub>                                           | Cardiovascular; diabetes    | Cohort                   | Neighborhood level education, unemployment rate, % recent immigrants, average household income, age, sex, comorbidities | UFP and NO <sub>2</sub> associated with diabetes and hypertension; NO <sub>2</sub> negatively associated with hypertension in 60-74 years. |
| <b>Henderson 2011 [66]</b> | British Columbia; southeastern corner; July – September 2003 | 281,711 participants; 46% male; Age: median age 45 (23-62 IQR); 0<5 years (4.3%), 5<10 years (5.0%), 10<20 years (12.3%), 20<30 years (9.5%), 30<40 years (11.5%), 40<50 years (15.4%), 50<60 years (14.3%), 60<70 years (11.8%), 70<80 years (10.3%), ≥80 years (6.3%) | PM <sub>10</sub>                                               | Cardiovascular; respiratory | Cohort                   | Neighborhood income, age, sex, number of physician visits in the previous year (preexisting smoke sensitivity)          | PM <sub>10</sub> associated with increased respiratory risk in 60-70 years and ≥80 years.                                                  |

|                           |                                                                                                                  |                                                                                                                                                           |                                                                            |                                                          |                 |                                                                                                                                                                              |                                                                                                                |
|---------------------------|------------------------------------------------------------------------------------------------------------------|-----------------------------------------------------------------------------------------------------------------------------------------------------------|----------------------------------------------------------------------------|----------------------------------------------------------|-----------------|------------------------------------------------------------------------------------------------------------------------------------------------------------------------------|----------------------------------------------------------------------------------------------------------------|
| <b>Crouse 2015 [67]</b>   | Alberta, British Columbia, Manitoba, Ontario, Quebec; urban; 1984 – 2006                                         | 735,590 participants; 48% male; 25-34 years (25.8%), 35-44 years (24.6%), 45-54 years (17.3%), 55-64 years (14.5%), 65-74 years (11.5%), ≥75 years (6.3%) | NO <sub>2</sub>                                                            | Cardiovascular; respiratory; diabetes; mortality         | Cohort          | % immigrant status, visible minority status, marital status, employment, education, household income, age, local climate                                                     | Non-accidental mortality<br>60-79 yr HR: 1.06 [1.04, 1.08]                                                     |
| <b>Farhat 2013 [68]</b>   | Alberta, British Columbia, Manitoba, Newfoundland and Labrador, Nova Scotia, Ontario, Quebec; urban; 1980 – 2001 | 1,564,583 deaths; Age: <75 years (52%), ≥75 years (48%)                                                                                                   | O <sub>3</sub> , PM <sub>2.5</sub>                                         | Cardiovascular; respiratory; mortality                   | Ecological      | 29 city-level variables on demographic, SES, health care, and lifestyle factors including male unemployment, % manufacturing, % of population stressed, and area of the city | O <sub>3</sub> and PM <sub>2.5</sub> were associated with increased risk in those ≥75 years.                   |
| <b>Goldberg 2013 [69]</b> | Quebec; urban; 1990 – 2003                                                                                       | 158,350 participants; ≥65 years                                                                                                                           | CO, NO <sub>2</sub> , O <sub>3</sub> , PM <sub>2.5</sub> , SO <sub>2</sub> | Mortality; cardiovascular; cancer; respiratory; diabetes | Cohort          | Seasonality                                                                                                                                                                  | Positive associations between all pollutants and non-accidental, cardiovascular and diabetes related mortality |
| <b>Vanos 2013 [70]</b>    | Alberta, British Columbia, Manitoba, Newfoundland and Labrador, Ontario, Quebec; urban; 1981 - 1999              | Age: <65 years, 65-74 years, 75-84 years, ≥85 years (distribution NR)                                                                                     | CO, NO <sub>2</sub> , O <sub>3</sub> , SO <sub>2</sub>                     | Mortality                                                | Cross-sectional | Age                                                                                                                                                                          | All pollutants associated with increased risk of mortality in ≥85 years.                                       |

|                          |                                                 |                                                                                                                                |                                                                                                         |                  |                     |                                                                                                                                                 |                                                                                                                                                                               |
|--------------------------|-------------------------------------------------|--------------------------------------------------------------------------------------------------------------------------------|---------------------------------------------------------------------------------------------------------|------------------|---------------------|-------------------------------------------------------------------------------------------------------------------------------------------------|-------------------------------------------------------------------------------------------------------------------------------------------------------------------------------|
| <b>de Roos 2014 [71]</b> | British Columbia; urban; 1994 - 2002            | 678,361 participants; 47.6% male; Age: 45-54 years (40.2%), 55-64 years (25%), 65-74 years (21.4%), 75-84 years (13.4%)        | Proximity to roads, BC, CO, NO, NO <sub>2</sub> , O <sub>3</sub> , PM <sub>2.5</sub> , PM <sub>10</sub> | Musculo-skeletal | Nested case-control | Neighborhood income level, age, sex                                                                                                             | O <sub>3</sub> associated with increased risk in ≥65 years.                                                                                                                   |
| <b>Chen 2017a [72]</b>   | Ontario, province-wide; April 1996 – March 2013 | 2,066,639 participants; 46.8% male; Age: mean age 66.8 (8.2 SD); 55-64 years (44.6%), 65-74 years (34.1%), 75-85 years (20.7%) | NO <sub>2</sub> , O <sub>3</sub> , PM <sub>2.5</sub>                                                    | Neurological     | Cohort              | Household income, education, Ontario Marginalization Index, regional differences, density of healthcare specialists, region, sex, comorbidities | PM <sub>2.5</sub> and NO <sub>2</sub> associated with increased risk of dementia in those 55-85 years.                                                                        |
| <b>Chen 2017b [73]</b>   | Ontario; province-wide; 2001 – 2013             | 2,194,519 participants; 46.6% male; Age: 55-85 years                                                                           | Proximity to roads, PM <sub>2.5</sub> , NO <sub>2</sub>                                                 | Neurological     | Cohort              | Unemployment, % recent immigrants, education, neighborhood income, sex, comorbidities                                                           | Closer proximity to roads, PM <sub>2.5</sub> and NO <sub>2</sub> associated with increased risk of dementia, PM <sub>2.5</sub> associated with increased risk of Parkinson's. |
| <b>Shin 2018b [74]</b>   | Ontario; province-wide; 1996 – 2012             | Parkinson's disease and dementia: 2,165,269 participants; 46.8% male; Age: mean age 66.8 (8.2 SD)                              | NO <sub>2</sub> , O <sub>3</sub> , PM <sub>2.5</sub>                                                    | Neurological     | Cohort              | Household income, education, Ontario Marginalization Index, regional differences, density of healthcare specialists, region, comorbidities      | PM <sub>2.5</sub> HR: 1.04 [1.01, 1.07]<br>O <sub>3</sub> HR: 1.04 [1.01, 1.07]                                                                                               |
| <b>Neupane 2010 [75]</b> | Ontario; urban; 2003 – 2005                     | 365 cases and 494 controls; Age: ≥65 years                                                                                     | NO <sub>2</sub> , PM <sub>2.5</sub> , SO <sub>2</sub>                                                   | Respiratory      | Case-control        | Education, occupational exposure, sex, comorbidities, modified Barthel Index                                                                    | NO <sub>2</sub> (IDW) OR: 2.30 [1.25, 4.21]<br>NO <sub>2</sub> (SPL) OR: 2.19 [1.25, 3.83]<br>PM <sub>2.5</sub> (IDW) OR: 2.26 [1.20, 4.24]                                   |

|                              |                                         |                                                                                                                                                                                                                                                                     |                                                            |             |                |                                            |                                                          |
|------------------------------|-----------------------------------------|---------------------------------------------------------------------------------------------------------------------------------------------------------------------------------------------------------------------------------------------------------------------|------------------------------------------------------------|-------------|----------------|--------------------------------------------|----------------------------------------------------------|
| <b>Szyszkowicz 2014 [76]</b> | Ontario; urban; 2003 – 2006             | 6,697 events; 45.1% male; Age: 2-14 years, (32.1%), 15-39 years, (39.3%), 40-59 years (19.6%), ≥60 years (9%)                                                                                                                                                       | AQHI, NO <sub>2</sub> , O <sub>3</sub> , PM <sub>2.5</sub> | Respiratory | Case-crossover | Age, season                                | No significant associations in ≥60 years observed.       |
| <b>Lavigne 2012 [77]</b>     | Ontario; urban; April 2002 – March 2009 | 3,728 participants; 45.3% male; Age: 2-14 years (33.1%), 15-39 years (40.3%), 40-59 years (19.2%), ≥60 years (7.4%)                                                                                                                                                 | NO <sub>2</sub> , CO, PM <sub>2.5</sub> , SO <sub>2</sub>  | Respiratory | Case-crossover | Age, seasons                               | Cold season O <sub>3</sub> ≥60 yrs OR: 1.60 [1.04, 2.45] |
| <b>Gan 2013 [78]</b>         | British Columbia; urban; 1994 – 2002    | 467,994 participants; 47% male; Age: mean age 60 (11 SD) years                                                                                                                                                                                                      | BC, NO, NO <sub>2</sub> , PM <sub>2.5</sub>                | Respiratory | Cohort         | Neighborhood income, age, sex, comorbidity | COPD hospitalization ≥65 yrs RR: 1.06 [1.02, 1.10]       |
| <b>To 2013 [79]</b>          | Ontario; province-wide; 2003 – 2006     | ~1.5 million persons with asthma during the study period; Age (outpatient, ED visits, and hospital admissions rate per 1000 persons): 0-4 years (1759, 175, 42), 5-9 years (623, 44, 7), 10-19 years (315, 23, 2), 20-59 years (527, 35, 3), ≥60 years (694, 27, 4) | AQHI, NO <sub>2</sub> , O <sub>3</sub> , PM <sub>2.5</sub> | Respiratory | Ecological     | Region of residence, age, season           | AQHI was associated with asthma in ≥60 years.            |
| <b>Ward 2015 [80]</b>        | Ontario; province-wide; 2000 – 2006     | 0-19 years, 20-64 years, ≥65 years (distribution NR)                                                                                                                                                                                                                | AQI, CO, O <sub>3</sub> , PM <sub>2.5</sub>                | Respiratory | Ecological     | Age, comorbidities                         | No significant associations observed in ≥65 years.       |

\* Reported results specific to immigrant populations. AQHI – Air Quality Health Index; AQI – Air Quality Index; BC – Black Carbon; UFP – Ultrafine particles (≤0.1 µm diameter)
